**P764**

### Right ventricular basal diameter, but not volume, can predict severe tricuspid regurgitation

Previtero M.<sup>1</sup>; Guta AC.<sup>2</sup>; Ochoa-Jimenez RC.<sup>3</sup>; Palermo C.<sup>1</sup>; Bottigliengo D.<sup>4</sup>; Figliozzi S.<sup>1</sup>; Baritussio A.<sup>1</sup>; Cecchetto A.<sup>1</sup>; Aruta P.<sup>1</sup>; Iliceto S.<sup>1</sup>; Badano LP.<sup>5</sup>; Muraru D.<sup>5</sup>

<sup>1</sup>University of Padova, Dpt of Cardiac, Thoracic and Vascular Sciences, Padua, Italy

<sup>2</sup>University of Medicine and Pharmacy Carol Davila, Bucharest, Romania

<sup>3</sup>Mount Sinai Medical Center, Internal Medicine Department, New York, United States of America

<sup>4</sup>University of Padova, Dpt of Statistic, Padova, Italy

<sup>5</sup>Italian Institute for Auxology IRCCS, San Luca Hospital, University Milano-Bicocca, Milan, Italy

**Background.** According to current EACVI guidelines, right ventricle (RV), tricuspid annulus (TA) and right atrium (RA) dilatation are supportive signs to identify severe functional tricuspid regurgitation (TR) by echocardiography. However, the ranking by which those parameters should be considered to identify severe TR remains to be clarified.

**Purpose.** Accordingly, the aim of this study is to compare RV, RA and TA association with severe TR and to rank them in order of importance to predict severe TR.

**Methods.** 302 patients ( $59 \pm 13$  years, 54 % women) with functional TR underwent two- and three-dimensional echocardiography. Using the nonparametric Variable Importance (VIMP) software package, we assessed the relative importance of 6 different parameters (indexed by body surface area) to identify severe TR: 3D RV end diastolic volume (RVEDVi), 3D RV end systolic volume (RVESVi), 3D RA max volume (3DRAi), 2D RA systolic volume (3DRAi), 2D RV basal diameter (2DRVdi) and 2D TAI measured in the apical 4-chamber view.

**Results.** According to EACVI multiparametric approach, 50/302 pts (17%) were found to have severe TR. 3DRAi (VIMP = 0.075) was the most important predictor of severe TR. 2DRVdi (VIMP= 0.005) was the second most important parameter and was the only parameter of RV dilation (RVEDVi= -0.0011 and RVESVi= -0.0012) associated to severe TR. Also, 2DRAi (VIMP= 0.023), and 2D TAI (VIMP= 0.004) showed good predictive ability.

**Conclusions.** Among the various right heart structures undergoing remodeling in patients with functional TR, RA dilation was the most important predictor of severe TR. Also the RV basal diameter, but not the volumes, was a predictor of severe TR. This underlines the importance of the shape, more than the volume of the RV as a predictor of severe TR.
